# Supplementary material for: Metagenome Profiling of Anterior Uterine Samples to Improve in-vitro Fertilization Success Ratio
Source: Research Square preprint supplement (doi:10.21203/rs.3.rs-1020192/v1), 2021-11-05
Supplement: Supplementary file 1 [file 63e1067f203e67076b437e61.xlsx]

## Sheet: Sheet1
Sr. No.	Sample Code	Age in Years	Marrieds Since	Infertility Type (Primary/Secondary)	Infertile period	Cause of infertility	Procedure	Protocal	Serum Progesterone levels	Endometrium Size	When embrio transferred	Number of embryos transfered	Antibiotic received	Assisted hatching done?	CL-Support received ?	Final fertility result
1	17/1	40	25 Years	Secondary	20 Years	Primary ovarian failure	OD/ICSI	Endometrium Preparation with tab. progynova	NA	9.1 mm triple	Sixth Day	3-Blastocyst, 3-Compacting embryos	Received	No	Received	Positive
2	17/2	22	4 Years	Secondary	2 Years	Male Factor	ICSI	Antagonist	1.3	11.8 mm Diffuse	Sixth Day	4-Blasto, 5-Compacting embryos	Received	No	Received	Positive
3	17/3	25	3 Years	Primary	2 Years	Male Factor	Tesa ICSI	Antagonist	1	12.2 mm Diffused	Sixth Day	1-Blasto,1-Comp	Received	No	Received	Positive
4	17/4	40	2 Years	Primary	2 Years	Reduce reseves with Endometrosis	IVF	Antagonist	0.45	10.3 mm Diffused	Sixth Day (Frozen embryo transfer)	4-Blasto	Received	Yes (on two)	Received	Positive
5	17/5	35	5 Years	Primary		Male Factor, with abnormal male Karyotype	ICSI	Antagonist	0.69	9.8 mm Diffused	Sixth Day	2-Blasto,2-Comp	Received	No	Received	Positive
6	17/6	25	4 Years	Secondary	3 Years	Unexplained	Tesa ICSI	Antagonist	1.2	9.6 mm Triple	Sixth Day	1-Blasto,1-Comp	Received	No	Received	Positive
7	17/7	32	14 Years	Primary	14 Years	Male factor	Tesa ICSI	Antagonist	1.5	12.6 mm triple	Sixth Day	2-Blasto	Received	No	Received	Positive
8	17/8	32	13 Years	Secondary	3 Years	Male factor and Reduce reseves	IVF (D/S)	Antagonist	1.5	12 mm triple	Sixth Day	6-Blasto	Received	No	Received	Positive
9	17/9	39	12 Years	Secondary	8 Years	Male factor and Reduce reseves	ED	Endometrium preparation with tab. progynova	2.6	13 mm Diffused	Fourth Day	5-8 cell stage	Received	No	Received	Positive
10	17/10	30	7 Years	Secondary	4 Years	Both fallopian tube blocked. History of tubectomy	OD	Endometrium preparation with tab. progynova	0.38	9.5 mm Triple/Changing	Sixth Day	3-Blasto,4-Comp	Received	No	Received	Positive
11	17/11	27	9 Years	Secondary	6 Years	Bad obstetric history with recurrent implantation failure	IVF (D/S)	Antagonist	0.8	6.8 mm Triple	No embryo transferred since no blasta formed	E.T Cancelled	Received	NA	NA	NA
12	17/12	32	10 Years	Secondary	8 Years	Male factor	ICSI	Antagonist	0.6	12.8 mm Triple	No embryo transferred since no blasta formed (Only 3-8 cell Unf++)	E.T Cancelled	Received	NA	NA	NA
13	17/13	24	11 Years	Secondary	10 Years	Male factor	IVF	Antagonist	0.8	11 mm Triple	Embrypo Transfer cancelled	Ovarian hypersimulation syndrome	Received	No	Received	NA
14	17/14	30	10 Years	Secondary	10 Years	Male factor	IVF (D/S)	Antagonist	1.06	10 mm Triple	Sixth Day	3-Blasto	Received	No	Received	Positive
15	17/15	35	18 Years	Primary	18 Years	Reduce reseves	OD/IVF	Endometrium preparation with tab. progynova		9 mm, Diffuse	Sixth Day	4-Blasto	Received	No	Received	Positive
16	17/16	34	17 Years	Primary	17 Years	Male factor+Reduce reseves+Bad obstetric history+Adenomyosis	OD/ICSI	Endometrium preparation with tab. .progynova	0.36	12 mm, Diffuse	Sixth Day	4-Blasto	Received	No	Received	Positive
17	17/17	38	18 Years	Primary	18 Years	Unexplained infertility with pulmonary tuberclosis with minor male factor	OD	Endometrium preparation with tab. progynova	>20	9.6 mm, Diffuse T-Shape	Sixth Day	3-Blasto	Received	No	Received	Negative
18	17/18	32	12 Years	Secondary	9 Years	Premature ovarian failure with Male Factor	OD/IVF	Endometrium preparation with tab. progynova	0.85	10.8 mm, triple Changing	Sixth Day	3-Blasto	Received	No	Received	Positive
19	17/19	35	15 Years	Secondary	12 Years	Male factor Reduce reseves	ED	Endometrium preparation with tab. progynova	0.9	9.2 mm, triple	Sixth Day	3-Blasto	Received	No	Received	Negative
20	17/20	30	6 Years	Primary	6 Years	Bilateral tubal block	OD	Endometrium preparation with tab. progynova	1.2	10.4 mm, Diffuse	Sixth Day	2-Blasto	Received	No	Received	Positive
21	17/21	22	4 Years	Primary	4 Years	Poly cyctic ovary with pelvic adhesion	ED	Endometrium preparation with tab. progynova	2.9	10.8 mm, Diffuse	Sixth Day (Frozen embryo transfer)	4-Blasto	Received	Yes	Received	Negative
22	17/22	30	7 Years	Secondary		Bilateral tubal block, Bad obstetric history and Reduce reseves	OD/IVF	Endometrium preparation with tab. Progynova	1.5	9.9 mm, changing	Sixth Day	3-Blasto	Received	No	Received	Negative
23	17/23	24	3 Years	Primary	3 Years	Premature ovarian failure with Minor Male Factor	IVF	Antagonist	1.1	9.6 mm, Diffuse	Sixth Day	2-Blasto (one intact second hatched)	Received	No	Received	Positive
24	17/24	22	8 Years	Secondary	6 Years	Premature ovarian failure	OD/IVF	Endometrium preparation with tab. progynova	0.95	8.4 mm, changing	Sixth Day	2-Blasto	Received	No	Received	Positive
25	17/25	25	4 Years	Primary	4 Years	Male Factor + Hypothyroidism	Tesa ICSI	Antagonist	1.1	15.6 mm, Diffuse	Sixth Day (Frozen embryo transfer)	3-Blasto,3-Comp	Received	Yes	Received	Negative
26	17/26	38	18 Years	Secondary	13 Years	BaOH with Reduce Reverse	ED	Endometrium preparation with tab. Progynova	1.45	7 mm, Diffuse	Sixth Day (Frozen embryo transfer)	2 early-Blasto	Received	Yes	Received	Negative
27	17/27	22	2 Years	Primary	2 Years	Unexplained	FET	Endometrium preparation with tab. Progynova	0.54	14 mm Diffuse	Sixth Day (Frozen embryo transfer)	3-Blasto,1-Comp	Received	Yes	Received	Positive
28	17/28	23	3 Years	Primary	3 Years	Unexplained	FET	Endometrium preparation with tab. progynova	0.95	10.5 mm Diffuse	Sixth Day (Frozen embryo transfer)	3-Blasto,1-Compacting	Received	Yes	Received	Positive
29	17/29	23	3.1/2 Years	Primary	3.1/2 Years	Male factor Reduce reseves	ICSI	Antagonist	2.2	9 mm Triple	Sixth Day (Frozen embryo transfer)	3-Blasto,4-Compacting	Received	Yes	Received	Positive
30	17/30	35	15 Years	Secondary	11 Years	BOH with PCOD	FET	Endometrium preparation with tab. progynova	0.8	11 mm Diffuse	Sixth Day (Frozen embryo transfer)	3-Blasto	Received	Yes (on two blastocyst)	Received	Positive
31	17/31	30	7 Years	Primary	7 Years	Unexplained with PCO	Tesa ICSI	Antagonist	0.48	10 mm Diffuse	Sixth Day	2-Blasto,2-Comp	Received	No	Received	Negative
32	17/32	29	5 Years	Primary	5 Years	Unexplained with PCO with HypothYearsoid	ICSI	Antagonist	0.73	10.2 mm Diffuse	Sixth Day	1-Blasto,2-Comp	Received	No	Received	Negative
33	17/33	32	18 Years	Primary	18 Years	Male factor Reduce reseves	ED	Endometrium preparation with tab. Progynova		8.8 mm triple	Sixth Day (Frozen embryo transfer)	5-Blasto	Received	Yes (on one)	Received	Negative
34	17/34	21	3 Years	Primary	3	Unexplained	IVF (D/S) with contorl	Antagonist	1.37	11.4 mm Diffuse	Sixth Day (Frozen embryo transfer)	3-Blasto (One comp)	Received	Done	Received	Positive
35	17/35	25	3 Years	Primary	3 Years	Male factor	IVF (D/S)	Antagonist	1.5	9.1 mm Diffuse	Sixth Day (Frozen embryo transfer)	3-Blasto comp+	Received	Yes (on two)	Received	Positive
36	17/36	40	7 Years	Secondary	2 Years	Reduce reseves With BOH with HypothYearsoid	OD	Endometrium preparation with tab. progynova	0.28	10.6 mm Diffuse	Sixth Day	2-Blasto	Received	Yes	Received	Positive
37	17/37	32	12 Years	Primary	12 Years	B/L tubal Block	IVF	Antagonist	1.4	9 mm triple	Sixth Day	4-Blasto	Received	No	Received	Negative
38	17/38	45	25	Secondary	20 Years	Male factor Reduce reseves	ED	Endometrium preparation with tab. Progynova	2.3	9.2 mm triple	Sixth Day	5-Blasto	Received	No	Received	Negative
39	17/39	30	10	Secondary	8 Years	Male factor Reduce reseves with Bad obstetric history	ED	Endometrium preparation with tab. progynova	1.5	8.7 mm Diffuse	Sixth Day	2-Blasto1-H Blasto	Received	No	Received	Negative
40	17/40	22	2 Years	Secondary	1 Year	Male factor with Bad obstetric history	ICSI	Antagonist	2	9 mm diffused	Sixth Day	1-Blasto,2-Comp	Received	No	Received	Negative
41	17/41	35	12 Years	Secondary	8 Years	Reduce reseves With Lef t salpingectomy for ectopic	IVF	Antagonist	0.8	9.2 mm Diffuse	Sixth Day	4-Blasto comp+	Received	No	Received	Negative
42	17/42	25	2 Years	Primary	2 Years	Male factor	IVF (D/S)	Antagonist	1.1	8.9 mm triple	Sixth Day	4-Blasto comp+	Received	No	Received	Positive
43	17/43	25	6 Years	Primary	6 Years	Unexplained	IVF	Antagonist	1.6	11 mm Diffuse	Sixth Day (Frozen embryo transfer)	2-Blasto	Received	Yes	Received	Positive
44	17/44	35	15 Years	Primary	15 Years	Male factor Reduce reseves	ED	Endometrium preparation with tab. progynova	1.4	12.2 mm Diffuse	Sixth Day (Frozen embryo transfer)	5-Blasto	Received	Yes (on two)	Received	Negative
45	17/45	29	3 Years	Primary	3 Years	Unexplained with polycyctic ovary with Hypothyrodism	FET	Endometrium preparation with tab. progynova	5.12	7.9 mm Diffuse	Sixth Day (Frozen embryo transfer)	4-Blasto	Received	Yes (on two)	Received	Negative
46	17/46	26	9 Years	Primary	9 Years	Male factor	Tesa ICSI/IVF (D/S)	Antagonist	1.3	10 mm triple	Sixth Day	3-Blasto	Received	No	Received	Positive
47	17/47	30	4 Years	Secondary	2 Years	Unexplained	IVF	Antagonist	0.8	9.0 mm	Sixth Day	2-Blasto	Received	No	Received	Positive
48	17/48	32	17 Years	Secondary	7 Years	Unexplained	ICSI	Antagonist	0.7	12 mm Diffuse	Sixth Day (Frozen embryo transfer)	4-Blasto	Received	Yes (on two)	Received	Positive
49	17/49	22	4 Years	Primary	4 Years	Premature ovarian failure with Minor Male Factor	OD	Endometrium preparation with tab. progynova	1.27	9.0 mm	Sixth Day (Frozen embryo transfer)	4-Blasto	Received	Yes (on two)	Received	Negative
50	17/50	40	1 Years	Primary	1 Year	Reduce reseves With Endometrosis	OD	Endometrium preparation with tab. progynova	4.8	8.6 mm Diffuse	Sixth Day (Frozen embryo transfer)	4-Blasto	Received	Yes (on two)	Received	Negative
51	17/51	28	8 Years	Primary	8 Years	Polycistic ovary with male factor	ICSI	Antagonist	1.5	10 mm diffuse	Sixth Day (Frozen embryo transfer)	2H-Blasto	Received	Yes	Received	Positive
52	17/52	35	2 Years	Primary	2 Years	Endometrosis	ICSI	Agonist	2.7	7.0 mm diffuse	Sixth Day (Frozen embryo transfer)	4-Blasto comp+	Received	Yes (on three)	Received	Negative
